# Supplementary material for: Intravitreal Ranibizumab Therapy for Diabetic Macular Edema in Routine Practice: Two-Year Real-Life Data from a Non-interventional, Multicenter Study in Germany
Source: Springer Nature journal article supplement (doi:10.1007/s13300-018-0513-2), 2018-10-04
Supplement: MOESM2 [file 16173130]

| Center (Hospital/Praxis)                                                              | Place                    |
|---------------------------------------------------------------------------------------|--------------------------|
| Praxis Dr. Bator-Banasik, Elisabeth                                                   | Ahaus                    |
| Augenzentrum Nordwest MVZ (Dr. Al-Romhein)                                            | Ahaus                    |
| Praxis Dr. Kutschbach, Hans Peter                                                     | Albstadt                 |
| Dr. med. Geertje Grütters                                                             | Altenholz                |
| Praxis Dr. Reindl-Postler, Angelika                                                   | Amberg                   |
| Praxis Dr. Op de Laak, Jean-Paul                                                      | Amberg                   |
| Praxis Dr. Blum, Werner                                                               | Amberg                   |
| Augenzentrum Andernach (Dr. Schmidt)                                                  | Andernach                |
| Praxis Dr. Schuster, Evelyn                                                           | Annaberg-Buchholz        |
| Praxis Dr. Hartmut Kramer und Elisabeth Bader                                         | Arnsberg                 |
| Praxis Dr. Reiher, Christina                                                          | Auerbach                 |
| Praxis Dr. Hälbig, Wolfgang                                                           | Augsburg                 |
| Praxis Dr. Jahn, Robert                                                               | Augsburg                 |
| Praxis Dr. Danelian, Liana                                                            | Augsburg                 |
| Praxis Dr. Kubaschinski, Georg                                                        | Augsburg                 |
| Praxis Dr. Lorenz, Reinhard                                                           | Augsburg                 |
| Gemeinschaftspraxis Drs. Scherer                                                      | Augsburg                 |
| Praxis Dr. Burkart, Ralf                                                              | Aulendorf                |
| Praxis Dr. Brandt, Stefanus                                                           | Aurich                   |
| Praxis Dr. Rieks, Johannes                                                            | Aurich                   |
| Praxis Dr. Kusber, Michael                                                            | Bad Arolsen-Meninghausen |
| Praxis Dr. Seebacher, Leonhard                                                        | Bad Bevensen             |
| Praxis Dittmer, Kâlogrêant S. Dr. med. (F)                                            | Bad Ems                  |
| Gemeinschaftspraxis Dr. Ruf, Dr. Wille                                                | Bad Gandersheim          |
| Praxis Dr. Luenzer, Elke                                                              | Bad Hersfeld             |
| Praxis Tyrtania, Thomas Dr.                                                           | Bad Kreuznach            |
| Praxis Dr. Werth, Dieter                                                              | Bad Liebenzell           |
| Praxis Dr. Klose, Matthias                                                            | Bad Reichenhall          |
| Praxis Dr. Berghold, Ulrike                                                           | Bad Sooden-Allendorf     |
| Gemeinschaftspraxis Dr. Schaal, Dr. Dinslage                                          | Bad Tölz                 |
| Praxis Dr. Schmidt-Betschel, Wolfram                                                  | Bad Wildungen            |
| Gemeinschaftspraxis Dr. König, Dr. Wißmann                                            | Baden - Baden            |
| Praxis Leistner, Sonja                                                                | Bamberg                  |
| Gemeinschaftspraxis Dr. Maximiliane Klatt, Dr. Alexander Klatt, Dr. Fabia Müller-Groh | Bassum                   |
| Praxis Dr. Mandler, Lothar                                                            | Baunatal                 |
| Krankenhaus Bautzen, Augenklinik Dr. Al-Ashi, Nasser                                  | Bautzen                  |
| Gemeinschaftspraxis Dres. Kampeter et. al. (Regler, Roman Dr.)                        | Bayreuth                 |
| Medizinisches Versorgungszentrum Beckum (Dr. Schwert)                                 | Beckum                   |
| Praxis Schultze, Thomas Dr.                                                           | Bergkamen                |
| Augenzentrum Lichterfelde West Dr. Wiemer, Dr. Kaulen, Dr. Hänsgen, Dr. Galanski      | Berlin                   |
| Praxis Dr. Kamkar, Tahereh                                                            | Berlin                   |
| Gemeinschaftspraxis Dr. Tetz, Dr. Kogan                                               | Berlin                   |
| Praxis Dres. Cordero (Cordero, Belinda Dr.)                                           | Berlin                   |
| Gemeinschaftspraxis Dres. Potthöfer und Behme                                         | Berlin                   |
| Gemeinschaftspraxis Dr. Gross, Bastienne Viehrig                                      | Berlin                   |
| Augenklinik am Wittenbergplatz (Dr. Thomas Pahlitzsch)                                | Berlin                   |
| Praxis Dr. Pahlitzsch Stephanie                                                       | Berlin                   |
| Praxis Thieme, Jochen Dr.                                                             | Berlin                   |
| Augenarztpraxis Dr. Hartmann, Hesse, Dr. Jerratsch & Kollegen (Dr. Hartmann)          | Berlin                   |
| Sankt Gertrauden-Krankenhaus GmbH (Wachtlin, Joachim PD Dr. med.)                     | Berlin (Wilmersdorf)     |
| Praxis Wünscher, Juliane Dr. (Sklenar, Ute)                                           | Bernau                   |
| Praxis Dr. Hey, Thomas                                                                | Bernburg                 |
| Praxis Dr. Jacob (Dr. Jacob, Iveta)                                                   | Bexbach                  |
| Gemeinschaftspraxis Dr. Pache, Dr. Planert, Dr. Engelhardt, Dr. Kube                  | Bielefeld                |
| Praxis Spielmann, Carla Dr.                                                           | Bielefeld                |
| Praxis Froböse, Michael Dr., E. Hippler-Mehring                                       | Bielefeld                |
| Praxis Kellner, Heidrun Dr.                                                           | Bismark                  |
| Praxis Dr. Voita, Matthias                                                            | Blomberg                 |
| Medizinisches Versorgungszentrum Bochum (Dr. Khaireddin)                              | Bochum                   |
| Praxis Dr. Berger, Till                                                               | Bochum                   |
| Praxis Scholz, Andreas Dr.                                                            | Bochum                   |

|                                                                                         |                      |
|-----------------------------------------------------------------------------------------|----------------------|
| Praxis Balcewicz (Balcewicz, Irek)                                                      | Bochum               |
| Praxis El-Hifnawy, Anja Dr.                                                             | Bochum               |
| Praxis Schelenz, Jörg Dr. med.                                                          | Bochum               |
| Praxis Schockenhoff, Thomas Dr.                                                         | Bönen                |
| Praxis Dr. Stappler Dorothee                                                            | Bonn                 |
| Gemeinschaftspraxis Dr. Faller, Keintzel-Schön                                          | Bonn                 |
| Universitätsklinikum Bonn Holz, Frank. G. Prof. Dr.                                     | Bonn                 |
| Praxis Dr. Gottschalk, Ulf                                                              | Borken               |
| Gemeinschaftspraxis Dres Pöstgens                                                       | Borken               |
| Praxis Dr. Langner, Andrea                                                              | Borna                |
| Praxis Dr. Großerhode, Peter                                                            | Bramsche             |
| Augenklinik-Augenarztpraxis Schlosscarré Dr. Grohmann, Dr. Kamouna (Dr. Llacer)         | Braunschweig         |
| Praxis Dr. Peter, Pia                                                                   | Braunschweig         |
| Praxis Rech, Annett                                                                     | Braunschweig         |
| Praxis Dr. Heinichen, Thomas                                                            | Braunschweig         |
| Praxis Naghibi, Alexander E. Dr.                                                        | Braunschweig         |
| Praxis Dr. Grüb, Mathias                                                                | Breisach am Rhein    |
| Krankenhaus St. Joseph-Stift GmbH (Oberarzt Dr. Cil)                                    | Bremen               |
| Praxis Dr. Winter, Martin                                                               | Bremen               |
| Praxis Dr. Böhm, Katrin                                                                 | Bremen               |
| Ambulante Augenoperation u. Diagnostik Nataliya Nehus (Hagen Müller)                    | Bremen               |
| Gemeinschaftspraxis Dr. Stefan Bodanowitz, Dr. Dzelila Birnbaum                         | Bremen               |
| Gemeinschaftspraxis Dr. Li Tsun Oei, Dr. Bilgic                                         | Bremerhaven          |
| Gemeinschaftspraxis Dr. Berger, Dr. Niehuus                                             | Bremerhaven          |
| Gemeinschaftspraxis Dr. Wehner, Dr. Meyer-Rößler                                        | Bremervörde          |
| Praxis Dr. Lauritzen, Kyra                                                              | Buchholz             |
| Praxis Dr. Drieschner, Claudia                                                          | Burgdorf             |
| Praxis Dr. Brohr, Stephan                                                               | Burghausen           |
| Praxis Dr. Ramez, Mohammad Osman                                                        | Buxtehude            |
| Gemeinschaftspraxis Dr. Stolzenberg, Dr. Haupeltshofer                                  | Castrop-Rauxel       |
| Praxis Enssen, Ludger Dr.                                                               | Castrop-Rauxel       |
| Gemeinschaftspraxis Dr. Goldammer (Dr. Karagyozov)                                      | Celle                |
| Praxis Dr. Parentin, Angelika                                                           | Chemnitz             |
| Praxis Dr. Bochmann, Sabine                                                             | Chemnitz             |
| Praxis Dr. Habrecht, Steffi                                                             | Chemnitz             |
| Praxis Dr. Uhlig, Marion                                                                | Chemnitz             |
| Praxis Dr. Richter, Petra                                                               | Chemnitz             |
| Praxis Dr. Oehmig, Karin                                                                | Chemnitz             |
| Praxis Dr. Chyla-Lüddeke, Joanna                                                        | Clausthal-Zellerfeld |
| Praxis Dr. Goldberg, Alexander                                                          | Coswig               |
| Praxis Brauer, Marina Dr.                                                               | Cottbus              |
| Praxis Dr. Piehler, Beate                                                               | Crimmitschau         |
| Praxis Dr. Niederstraßer, Dirk                                                          | Cuxhaven             |
| Gemeinschaftspraxis Dres Steiner                                                        | Dannenberg           |
| Klinikum Darmstadt GmbH (Prof. Emmerich)                                                | Darmstadt            |
| Praxis Dr. Pankow, Gabriele                                                             | Deisenhofen          |
| Praxis Neferu, Daniel Dr.                                                               | Delbrück             |
| Praxis Dr. Radke, Ina                                                                   | Demmin               |
| Praxis Antje Nette                                                                      | Dessau               |
| Städtisches Klinikum Dessau (Dr. Krause)                                                | Dessau-Roßlau        |
| Gemeinschaftspraxis Dres. Giers, von Lovenberg und Partner (Dr. Bertalan)               | Detmold              |
| Dr. Jürgen Bosche                                                                       | Diepholz             |
| Gemeinschaftspraxis Dr. Lenz, Dr. Seybold, Dr. Schmid, Dr. Kaden, Dr. Höhn, Dr. Morasch | Dillingen            |
| Medizinisches Versorgungszentrum Lorens-Glowania, Elisabeth Dr.                         | Dorsten              |
| Klinikum Dortmund GmbH (Dr. Ringwald, Andreas)                                          | Dortmund             |
| Praxis Tran, Thanh-Truc                                                                 | Dortmund             |
| Praxis Teimann, Ulrich Dr.                                                              | Dortmund             |
| Praxis Baldini-Borsich, Roberto Dr. med.                                                | Dortmund             |
| Praxis Krause, Roswitha Dr.                                                             | Dortmund             |
| Praxis Dr. Gerrett Brief                                                                | Dortmund             |
| Praxis Dr. Maaß, Bernd                                                                  | Dreieich             |
| Gemeinschaftspraxis Dr. Müller-Holz, Dr. Riedel                                         | Dresden              |
| Praxis Dr. Hellmund, Kerstin                                                            | Dresden              |

|                                                                         |                         |
|-------------------------------------------------------------------------|-------------------------|
| Praxis Dr. Schwanitz, Katharina                                         | Dresden                 |
| Gemeinschaftspraxis Dr. Hoza, Pavel                                     | Dresden                 |
| Praxis Dr. Blümel, Christian                                            | Dresden                 |
| Praxis Dr. Gaßmann, Carsten                                             | Dresden                 |
| Gemeinschaftspraxis Dres Huhle                                          | Dresden                 |
| Praxis Dr. Matthes, Regina                                              | Dresden                 |
| Praxis Dr. Beddermann, Insa                                             | Duderstadt              |
| Universitätsklinikum Augenklinik Düsseldorf Dr. Guthoff, Rainer         | Düsseldorf              |
| Maria Hilf NRW gGmbH, St.Martinus-Krankenhaus (Dr. Klaus-Dieter Lemmen) | Düsseldorf              |
| Praxis Dr. Laube, Thomas                                                | Düsseldorf              |
| IIO (Internationale Innovative Ophthalmochirurgie) (Kaymak, Hakan)      | Düsseldorf              |
| Praxis Dr. Mohammadi, Babak                                             | Düsseldorf              |
| Lumemedico Gemeinschaftspraxis Dr. Bohnen, Dr. Innocenti                | Düsseldorf              |
| Praxis Keimes, Emilia Dr. (BG)                                          | Düsseldorf              |
| Praxis Milanov, Ivan Dr.                                                | Düsseldorf              |
| Praxis Herbig, Erdmuth                                                  | Ebersbach-Neugersdorf   |
| Praxis Dr. Gotzler, Katherina                                           | Ebersberg               |
| Praxis Thomas Merkel                                                    | Eckernförde             |
| Praxis Dr. Wacker, Jan                                                  | Eggenfelden             |
| Gemeinschaftspraxis Dr. Hillenbrand, Dr. Schütz                         | Ehingen                 |
| Praxis Dr. Gittner, Christian                                           | Einbeck                 |
| Gemeinschaftspraxis Dr. Ruf, Andrea Wille (Dr. Meister)                 | Einbeck                 |
| Gemeinschaftspraxis Dr. Ruf, Andrea Wille (Kroll)                       | Einbeck                 |
| Praxis Hadry, Ismael Dr.                                                | Eisenach                |
| Augenzentrum am Klinikum Emden zum Bruch, Frisch, Garcia                | Emden                   |
| Praxis Dr. O. Löwen, Dr. U. Hackethal                                   | Emsdetten               |
| Praxis Lauhoff, Thomas                                                  | Ennigerloh              |
| Praxis Dr. Merz (Dr. Merz, Antje)                                       | Eppelborn               |
| Praxis Dr. med. Alexander Groneberg (Hochhaus, Frederike Dr. med.)      | Erding                  |
| Praxis Dr. Leipert, Stephanie                                           | Erding                  |
| Praxis Sartorius, Olga                                                  | Erkrath                 |
| Praxis Ulrich, Frank Dr.                                                | Erlangen                |
| Gemeinschaftspraxis Dr. Heinrich, K. Wawi                               | Eschwege                |
| Praxis Dr. Schmidt, Fred Michael                                        | Eschwege                |
| Gemeinschaftspraxis Dres Storms                                         | Essen                   |
| Gemeinschaftspraxis Dr. Farke, Dr. Mauß                                 | Essen                   |
| Gemeinschaftspraxis Dres Schäferhoff, Dr. Rösler                        | Esslingen               |
| Praxis Fry, Marianne Dr. med.                                           | Fellbach                |
| Praxis Purnama, Iksan                                                   | Fellbach                |
| Praxis Werthmann, Maria Dr.                                             | Filderstadt             |
| Augenklinik Flensburg Treumer, H. Prof. Dr. med. (Elshinnawi, Ahmed)    | Flensburg               |
| Praxis Sieber, Stephanie Dr.                                            | Flöha                   |
| Gemeinschaftspraxis Dr. Reichert, Dr Hautzinger                         | Frankenthal             |
| Gemeinschaftspraxis Dr. Reichert, Dr Hautzinger                         | Frankenthal             |
| Praxis Dr. Matterstock, Gunter                                          | Frankfurt               |
| Praxis Fuchs, Michael                                                   | Frankfurt               |
| Praxis Prasiswa, Ulrike Dr. med.                                        | Frankfurt a.M. - Höchst |
| Gemeinschaftspraxis Dr. Heiland, Dr. Troost, Noll                       | Frankfurt am Main       |
| Gemeinschaftspraxis Dr. Götting, Dr. Mintzer                            | Frankfurt am Main       |
| Praxis Dr. Farahvash, Vahideh                                           | Frankfurt am Main       |
| Gemeinschaftspraxis Dr. Allers, Agnes                                   | Frankfurt am Main       |
| Praxis Prof. Dr. med. A. Zubcov-Iwantscheff                             | Frankfurt am Main       |
| Klinikum der Johann- Wolfgang Goethe Universität (Dr. Henrik Schäfer)   | Frankfurt am Main       |
| Augenzentrum Friedberg Dr. Niederdellmann und Kollegen                  | Friedberg               |
| Praxis Sichert, Ulrich Dr.                                              | Friedberg               |
| Praxis Kolitsch, Sibylle Dr.                                            | Friedrichsdorf          |
| Praxis Eckert, Bernd Dr.                                                | Friedrichsthal          |
| Praxis Dr. Mönnig, Burkhard                                             | Fröndenberg             |
| Praxis Dr. Pohlmann, Dirk                                               | Fulda                   |
| Gemeinschaftspraxis Dr. Goebels, Dr. D. M. Handzel                      | Fulda                   |
| Praxis Dr. Neugebauer-Nowak, E.                                         | Fulda                   |
| Praxis Dr. Brändle, Jürg                                                | Füssen                  |
| Praxis Dr. Peter Buchmann (Dr. Harder)                                  | Garching                |

|                                                                             |                    |
|-----------------------------------------------------------------------------|--------------------|
| Praxis Dr. Hamm-Bentler, Cornelia                                           | Garching           |
| Praxis Dr. Fritzsche, Joachim                                               | Gehrden            |
| Gemeinschaftspraxis Dr. Anastassiou, Dr. Fadzeyeva                          | Gelsenkirchen      |
| Praxis Dr. Tappe, Klemens                                                   | Georgsmarienhütte  |
| Praxis Dr. Boccalini, Pietro                                                | Georgsmarienhütte  |
| Praxis Dr. Büttner (Gerth, Katharina Dr.)                                   | Gera               |
| Praxis Schroth, Heike Dr.                                                   | Gera               |
| Gemeinschaftspraxis Dr. Jung, Dr. Kibittel                                  | Gersthofen         |
| Praxis Dr. Externbrink, Piet                                                | Geseke             |
| Gemeinschaftspraxis Dr. Schulz, Dr. Pletscher                               | Gifhorn            |
| Praxis Dipl. Med. Sprenger, Marion                                          | Glienicke          |
| Praxis Dr. Hettesheimer, Hans                                               | Göppingen          |
| Praxis Dr. Frey, Christian                                                  | Göppingen          |
| Dr. Antje Ammermann                                                         | Göttingen          |
| Praxis Dr. Feldner, Björn                                                   | Göttingen          |
| Praxis Dr. Wiese, Christine                                                 | Göttingen          |
| Praxis Dr. Winter-Buerke, Sandra                                            | Göttingen          |
| Praxis Dr. Polly, Eva                                                       | Göttingen          |
| Praxis Dr. Adams-Deinhard, Sabine                                           | Göttingen          |
| Georg-August-Universität Göttingen (Dr.Feltgen)                             | Göttingen          |
| Gemeinschaftspraxis Dr. Egbert, Dr. Oelhafen von Schoellenbach              | Göttingen - Weende |
| AugenCentrum Gräfenhainichen Dipl. med. P. Heilmann, J. Hoyer               | Gräfenhainichen    |
| Praxis Dr. Diebow, Dörte                                                    | Greifswald         |
| Universität Greifswald, Klinik u. Poliklinik f. Augenheilkunde (Prof. Tost) | Greifswald         |
| Praxis Dipl.-Med. Vulpius, Kerstin                                          | Grimmen            |
| Praxis Dr. Müller, Christian                                                | Gröbenzell         |
| Praxis Fontana, Rainer Dr.                                                  | Grünstadt          |
| Praxis Dr. Fischer, Christiane                                              | Grünwald           |
| Praxis Dr. Schemuth, Winfried                                               | Haag               |
| Gemeinschaftspraxis Dr. Buhl, Dr. Herzum                                    | Haar               |
| Praxis Lützenbürger, Andrea                                                 | Hagen              |
| Praxis Dr. Twelbeck, Walter                                                 | Hagen a.T.W.       |
| Praxis Dr. Eichfeld (Dr.Eichfeld, Kerstin)                                  | Halle              |
| Dr. Thomas Hammer                                                           | Halle              |
| Gemeinschaftspraxis Dres Franke                                             | Halle (Saale)      |
| Praxis Dr. Höche Antje                                                      | Halle / Saale      |
| Gemeinschaftspraxis Dres. Irmgard und Hans-Wighard Elten                    | Halle/W.           |
| Augenärzte am Rathausmarkt Dr. Eike Matthiessen                             | Hamburg            |
| Universitätsklinikum Hamburg-Eppendorf (Dr. Gisbert Richard )               | Hamburg            |
| Praxis Dr. Machnik, Bertram                                                 | Hamburg            |
| Asklepios Klinik Altona (Dr. Rose)                                          | Hamburg            |
| Asklepios Klinik Nord-Heidberg (Dr. Dave)                                   | Hamburg            |
| Asklepios Klinik Barmbek (Dr. Schaudig)                                     | Hamburg            |
| Gemeinschaftspraxis Dr. Kaupke, Görges, Dr. Miebach                         | Hamburg            |
| Gemeinschaftspraxis Dr. Bätz, Dr. Neuhaus-Richard                           | Hamburg            |
| Augenärzte Weidenbaumsweg Dr. Soheyl Ali Asadi                              | Hamburg            |
| MEC Augenärzte Dr. Heuer, Dr. Bischoff, Dr. Kunne (Dr. Bischoff)            | Hamburg            |
| St. Barbara-Klinik Hamm GmbH (Dr. Pintea)                                   | Hamm               |
| Praxis Hörstensmeyer, Claus Dr.                                             | Hamm               |
| Praxis Kraemer, Christa Verena Dr.                                          | Hamm               |
| Praxis Dr. Salzmann, Nadja                                                  | Hannover           |
| Praxis Dr. Wichmann, Wolfgang                                               | Hannover           |
| Praxis Dr. Tuscher, Andreas                                                 | Hannover           |
| Gemeinschaftspraxis Dr. Selle, Dr. Pauli, Karin Kaczmarek                   | Hannover           |
| KRH Klinikum Nordstadt (Prof. Dr. Burkhard Wiechens)                        | Hannover           |
| Praxis Dr. Köhler, Thomas                                                   | Hannover           |
| Praxis Leuschner, Monica P. Dr.                                             | Hannover           |
| Praxis Dr. Kaufmann, Daniel                                                 | Hannover           |
| Praxis Dr. Schweer, Michael                                                 | Hanstedt           |
| Praxis Dr. Wierwille, Volker                                                | Haren / Ems        |
| Universität Heidelberg Prof. Auffarth (Dr. Kretz)                           | Heidelberg         |
| Praxis Schön, Joachim Dr.                                                   | Heidenheim         |
| Praxis Dr. Brusis, Annette                                                  | Heppenheim         |

|                                                                                               |                          |
|-----------------------------------------------------------------------------------------------|--------------------------|
| Praxis Schmidt, Roland E.E. Dr.                                                               | Herne                    |
| Praxis Dr. Keller, Othmar                                                                     | Herrsching               |
| Gemeinschaftspraxis Dr. Winter-Khoshreza, Dr. Khaleghi Zand                                   | Heusweiler               |
| Praxis Dr. Pfeufer, Eva-Maria                                                                 | Hildburghausen           |
| Gemeinschaftspraxis Dr. Schmucker, Dr. Pusch                                                  | Hirschaid                |
| Praxis Dr. Galert, Sylvia                                                                     | Hohenmölsen              |
| AugenGesundheitsZentrum (Dr. Fiore)                                                           | Holzkirchen              |
| Praxis Andreas Hueck                                                                          | Holzkirchen              |
| Universitätsklinikum des Saarlandes, Klinik für Augenheilkunde Prof. Dr. Seitz                | Homburg / Saar           |
| Gemeinschaftspraxis Dr. Stephan Kiliyas, Urte Fetter, Dr. Ingmar Fetter                       | Hoppegarten              |
| Praxis Dres. Maier und Liedtke-Maier                                                          | Hösbach                  |
| Gemeinschaftspraxis Dr. Becker, Dr. Thale                                                     | Höxter                   |
| Praxis Dipl.med. Neugärtner, Christa                                                          | Hoyerswerda              |
| Augenzentrum Hürth Dr. Morbach, Margit                                                        | Hürth                    |
| Gemeinschaftspraxis Dres. Steinkamp, Zerhusen                                                 | Ibbenbüren               |
| Praxis Sarafiant, Isabel Dr.                                                                  | Idar - Oberstein         |
| Praxis Dr. Bastian (Dr. Bastian, Bernhard)                                                    | Illingen                 |
| Praxis Dr. Grasbon, Thomas                                                                    | Ingolstadt               |
| Augen Allianz-Zentrum Bayern Mitte (Dr. Oehmig)                                               | Ingolstadt               |
| Augen Allianz Zentrum Bayern Mitte (Dr. Sandra Oehmig)                                        | Ingolstadt               |
| Augenzentrum Ruhr - Iserlohn Dr. Osman, Turhan                                                | Iserlohn                 |
| Praxis Dr. Breitrück, Uwe                                                                     | Iserlohn                 |
| Praxis Dr. Kleczka, Christian                                                                 | Isernhagen/Altwarmbüchen |
| Gemeinschaftspraxis Dr. Lohse, Dr. Jäger                                                      | Jena                     |
| Gemeinschaftspraxis Dr. Lohse, Dr. Jäger                                                      | Jena                     |
| Praxis Dr. Schmidt, Susanne                                                                   | Jever                    |
| Gemeinschaftspraxis Dres Zintl                                                                | Kahla                    |
| Gemeinschaftspraxis Dr. Grewing, Dr. Dillinger und Kollegen                                   | Kaiserslautern           |
| Gemeinschaftspraxis Dr. Buchmann, Dr. Gavris, Dr. Siochos                                     | Karlsfeld                |
| Gemeinschaftspraxis Dr. Berens, Dr. Schumacher, Dr. Saschin                                   | Karlsruhe                |
| Praxis Dr. Rene Goubeaud                                                                      | Karlsruhe                |
| Augenklinik am Kaiserplatz (Dr. Thomas Kohm)                                                  | Karlsruhe                |
| Diakonissen-Krankenhaus Karlsruhe (Dr. Schöpfer, Kilian)                                      | Karlsruhe                |
| Praxis Dr. Kernchen, Karima                                                                   | Kassel                   |
| Praxis Dr. Schult, Judith                                                                     | Kassel                   |
| Praxis Dr. Hartmann, Matthias                                                                 | Kaufungen                |
| Praxis Dr. Peter Eschstruth                                                                   | Kiel                     |
| Praxis Dr. Schmitt, Rudolf                                                                    | Kirchheim                |
| Praxis Dr.Bisorca (Dr.Bisorca, Radu-H.)                                                       | Kleinblittersdorf        |
| Augenzentrum Koblenz (Dr. Berenstein)                                                         | Koblenz                  |
| Praxis Dr. Fendel, Andreas                                                                    | Koblenz                  |
| Augenzentrum Koblenz (Dr. Brandtner)                                                          | Koblenz                  |
| Kliniken der Stadt Köln GmbH, Augenklinik Chefarzt Prof. Dr. Schrage                          | Köln                     |
| Augenärzte Schildergasse Dr. Hollmann, Dr. Floren, Dr. Lung                                   | Köln                     |
| St. Elisabeth-Krankenhaus Klinik für Augenheilkunde (Dr.Berk)                                 | Köln                     |
| Augenzentrum am Ring Dr. Akgül, Dr. (Tr) Bagci, Dogan                                         | Köln                     |
| Gemeinschaftspraxis Dr. Schönewolf, Reinhardt, Gaul                                           | Königs Wusterhausen      |
| Praxis Dr. Roesen, Klaus-Dietrich                                                             | Korbach                  |
| Praxis Matthias, Sylke Dr. (Univ. Pecs)                                                       | Köthen / Anhalt          |
| Praxis Dr. Richter, Joachim                                                                   | Kreuztal                 |
| Praxis Dr. Kniepert, Juliane                                                                  | Kriftel/Ts.              |
| Gemeinschaftspraxis Dr. Niermann, Dr. Gaschermann-Matterstock                                 | Kronberg                 |
| Gemeinschaftspraxis Dr. Gaschermann-Matterstock, Dr. Niermann                                 | Kronberg                 |
| Praxis Dr. Kammerer, Maria                                                                    | Kümmersbruck             |
| Gemeinschaftspraxis Dr. Hoffmann, Dr. Wehrle, Dr. Jörg                                        | Landau                   |
| Augen-Medizinisches Versorgungszentrum Prof. Dr. Sachsenweger et. al. (Dr. Töpfer von Schütz) | Landshut                 |
| Praxis Dr. Ziegler, Henning                                                                   | Landshut                 |
| Praxis Dr. Bothe, Nicola                                                                      | Langenhagen              |
| Gemeinschaftspraxis Dres Wolter-Roessler                                                      | Lauf / Pegnitz           |
| Praxis Dr. Serguhn, Stefan                                                                    | Lauterbach               |
| Gemeinschaftspraxis Dr. Winter-Khoshreza, Dr. Khaleghi Zand                                   | Lebach                   |
| Praxis Dr.Manderscheid (Dr.Manderscheid, Reinhold)                                            | Lebach                   |
| MVZ Tagesklinik Leer (Dr. Heidemann)                                                          | Leer                     |

|                                                                               |                        |
|-------------------------------------------------------------------------------|------------------------|
| Praxis Dr. Mättig, Wolf-Ulrich                                                | Leipzig                |
| Praxis Dr. Grobe, Anja                                                        | Leipzig                |
| Praxis Dr. Wagner, Harald                                                     | Leipzig                |
| Praxis Dr. Schütze, Cornelia                                                  | Leipzig                |
| Praxis Lieschke, Dr. Wolfram                                                  | Leipzig                |
| Praxis Dr. Göllnitz, Renate                                                   | Leipzig                |
| Augen + Laserzentrum (Dr. Kiraly)                                             | Leipzig                |
| Praxis Nenning, Norma Dr.                                                     | Leipzig                |
| Augenzentrum am Johannisplatz (Dr. Petzold)                                   | Leipzig                |
| Universitätsklinikum Leipzig, Klinik f. Augenheilkunde (Prof. Dr. Dawczynski) | Leipzig                |
| Praxis Dr. Schmitz, Mario                                                     | Lemgo                  |
| Praxis Hoffmann, Andrea Dr.                                                   | Lennestadt/Elspe       |
| Praxis Dr. Knapp, Dietrich                                                    | Leutkirch              |
| Praxis Dr. Schubert (Heike Groß)                                              | Limbach-Oberfrohna     |
| Praxis Dr. Schubert Ondra                                                     | Limbach-Oberfrohna     |
| Praxis Georgi, Matthias Dr.                                                   | Lindau                 |
| Praxis Dr. Hommayda, Erika                                                    | Linz                   |
| Dr. Beate Dornig                                                              | Löbau                  |
| Praxis Dr. David, Martina                                                     | Lohne                  |
| Praxis Dres. Burkhard Burkhard, Carsten Dr.                                   | Lohne                  |
| Praxis Dr. Iskandar, Ghassan                                                  | Löhne                  |
| Praxis Dr. Eickhorst, Martin                                                  | Löningen               |
| Gemeinschaftspraxis Dr. Beckendorf, Dr. Kleineidam, Dr. Kruse                 | Lübeck                 |
| Universitätsklinikum LübeckKlinik für Augenheilkunde (Prof. Grisanti)         | Lübeck                 |
| Märkische Kliniken GmbH, Klinikum Lüdenscheid, Augenklinik (Dr. Kaskel-Paul)  | Lüdenscheid            |
| Gemeinschaftspraxis Dr. Linares, Dr. Winkgen, Diana Hülsmann                  | Lüdenscheid            |
| Gemeinschaftspraxis Dr. Sahyoun und Dr. El-Kishawi                            | Lüdenscheid            |
| Gemeinschaftspraxis Dr. Sahyoun und Dr. El-Kishawi                            | Lüdenscheid            |
| Augenarztpraxis Dr. Ina Kortüm, Dr. Georg Friedrich Kortüm                    | Ludwigsburg            |
| Gemeinschaftspraxis Dres Curschmann, J. Logies, Dr. Radig-Thomas, Dr. Reuland | Ludwigshafen           |
| Praxis Viktor Gossmann                                                        | Ludwigshafen a. R.     |
| Praxis Dr. Ewert                                                              | Ludwigslust            |
| Gemeinschaftspraxis Dr. Asani und Kollegen (Fr. Kjata, Azra)                  | Lünen                  |
| Praxis Dr. Schwalbe, Christel                                                 | Lutherstadt Wittenberg |
| Praxis Kitzler, Ludmilla                                                      | Mainz                  |
| Gemeinschaftspraxis Dr. Breitkopf / Dres. Kauffmann                           | Mainz                  |
| Gemeinschaftspraxis Dr. Markus Müller, Dr. Roland Richter, Dr. Astrid Caracas | Mainz                  |
| Universitätsmedizin der Johannes Gutenberg Universität (Dr. Korb)             | Mainz                  |
| Praxis Dr. Roland Glück                                                       | Mannheim               |
| Praxis Dr. Scheiner, Uwe                                                      | Mannheim               |
| Gemeinschaftspraxis Dr. Forster, Dr. Thomsen                                  | Mannheim               |
| Gemeinschaftspraxis Dr. Forster, Dr. Thomsen                                  | Mannheim               |
| Praxis Dr. Kausen (Dr. med. Kausen, Joachim)                                  | Marburg                |
| Universitätsklinikum Gießen und Marburg GmbH (Dr. Bertelmann)                 | Marburg                |
| Praxis Dr. Geißendörfer, Thomas                                               | Marktredwitz           |
| Praxis Dr. Krohner, Hyunil                                                    | Marl                   |
| Praxis Dr. Sigleur, Rainer                                                    | Marl                   |
| Praxis Dr. Helm, Robert                                                       | Maxdorf                |
| Praxis Dr. Friedrich, Gabriele                                                | Meerane                |
| Praxis Dr. Fiedler, Uta                                                       | Meinersen              |
| Praxis Dr. Karras, Cornelia                                                   | Meiningen              |
| Praxis Dr. Burger, Michael                                                    | Memmingen              |
| Praxis Nüchel, Alfred Dr.                                                     | Menden                 |
| Augenzentrum Emsland (Dr. Schumacher)                                         | Meppen                 |
| Praxis Dr. Ahrens, Thomas                                                     | Mettingen              |
| Praxis Grunz, Katherina                                                       | Mühlacker              |
| Praxis Dr. Juranek, Radomir                                                   | Mühdorf/Inn            |
| Evangelisches Krankenhaus Mühlheim an der Ruhr Dr. Lösche, Cay Christian      | Mühlheim an der Ruhr   |
| Gemeinschaftspraxis Prof. Dr. Neuhann (Dr. Wolf)                              | München                |
| Gemeinschaftspraxis Prof. Dr. Neuhann (Dr. Waltrich)                          | München                |
| Gemeinschaftspraxis Prof. Dr. Neuhann (Dr. Bornhauser)                        | München                |
| Gemeinschaftspraxis Prof. Dr. Neuhann (Dr. Haindl-Mairhofer)                  | München                |
| Praxis Dr. Kuba, Gabriele                                                     | München                |

|                                                                           |                      |
|---------------------------------------------------------------------------|----------------------|
| Praxis Dr. Kenyon, Bärbel                                                 | München              |
| Augenklinik Theresienhöhe (Dr. Hakim)                                     | München              |
| Praxis Dr. Socrates Dimitriou (Dr. Schultmeyer)                           | München              |
| Dr. Elisabeth Jakobs                                                      | München              |
| Praxis Dr. Butenberg, Dirk                                                | München              |
| Praxis Dr. Wiederholt, Boris                                              | München              |
| Praxis Dr. Sondermayer, Walter                                            | München              |
| Praxis Dr. Weede, Sigrun                                                  | München              |
| Praxis Dr. Künnecke, Anita                                                | München              |
| Augenärzte Pasinger Hofgärten (Dr. Eickstädt)                             | München              |
| Praxis Schmid, Christoph Dr.                                              | München              |
| Augenärzte Pasinger Hofgärten (Dr. Gekeler)                               | München              |
| Praxis Stark, Cornelia Dr.                                                | München              |
| LMU München (Dr. Armin Wolf)                                              | München              |
| TU München Prof. Lohmann (Dr. Feucht)                                     | München              |
| Gemeinschaftspraxis Dr. Frei, Simone, Dr. Frimberger, Stephanie           | München              |
| Praxis Gaißinger, Anton Dr.                                               | München              |
| Praxis Dr. Siegmund (Dr. Kochs)                                           | München Neuhausen    |
| Augenklinik Airport München (Bechmann, Martin)                            | München-Flughafen    |
| Praxis Dr. Emde, Christiane                                               | Munster              |
| Westfälische-Wilhelms-Universität Münster (Prof. Eter)                    | Münster              |
| Praxis Dr. Thelen, Ulrich                                                 | Münster              |
| Praxis Dr. Beev, Valentin                                                 | Münster              |
| Praxis Dr. Obens-Laumanns, Dagmar                                         | Münster              |
| Gemeinschaftspraxis Müller, U. / Wening, Jan                              | Münster              |
| Praxis Dr. Lücking, Wolfgang                                              | Münster              |
| Praxis Normann-Schüling, Jutta Dr.                                        | Münster              |
| Praxis Kienecker, Gerald Dr.                                              | Münster              |
| Augenklinik am St. Franziskus-Hospital Münster (Dr. Gutfleisch, Matthias) | Münster              |
| Praxis Weckerle, Petra Dr.                                                | Murnau               |
| Praxis Tesnau, Renata Dr.                                                 | Mutterstadt          |
| Praxis Dr. Rehfeldt, Karsta                                               | Neubrandenburg       |
| Praxis Dr. Edda, Kulow                                                    | Neubrandenburg       |
| Dietrich-Bonhoeffer-Klinikum Prof. Dr. Helmut Höh                         | Neubrandenburg       |
| Praxis Dr. Wegent, Regine                                                 | Neubrandenburg       |
| Praxis Dr. Ehrensneider, Udo                                              | Neuburg              |
| Praxis Dr. Woldt, Christiane                                              | Neuenhaus            |
| Praxis Herbold, Tobias Dr.                                                | Neuenkirchen         |
| Praxis Söllner, Thilo Dr.                                                 | Neu-Isenburg         |
| Praxis Dr. Mann, Lydia                                                    | Neunburg vorm Wald   |
| Praxis Dastbaz, Ali Dr.                                                   | Neunkirchen          |
| Praxis Dr. Scholz (Dr. Scholz, Simone)                                    | Neunkirchen          |
| Praxis Dr. (RO) Dana-Christina Mikleu                                     | Neuss                |
| Praxis Dr. Wildner, Bodo                                                  | Neustadt             |
| Praxis Dr. Wildner, Annette                                               | Neustadt             |
| Praxis Müller, Stefan Dr.                                                 | Neustadt             |
| Praxis Dr. Andreas Liermann                                               | Neustadt /Weinstraße |
| Praxis Dr. Winkler von Mohrenfels, Christoph                              | Neutraubling         |
| Praxis Roesen, Bernhard Dr.                                               | Neutraubling         |
| Gemeinschaftspraxis Dr. Gäckle, Dr. Knittel (Dr. Schell)                  | Neu-Ulm              |
| Praxis Dr. Gockeln, Roland                                                | Nienburg             |
| Gemeinschaftspraxis Dr. Holzwarth, Dr. Hoffmann                           | Nordhausen           |
| Gemeinschaftspraxis Karl-Heinz Schott und Peter Stracke                   | Northeim             |
| Maximilians-Augenklinik GmbH (Prof. Dr. Schrader)                         | Nürnberg             |
| Gemeinschaftspraxis Dr. Gruber, Dr. Riemann                               | Nürtingen            |
| Gemeinschaftspraxis Dres Kaps                                             | Obernkirchen         |
| Praxis Reckels, Hans-Joachim Dr.                                          | Oelde (Westphalen)   |
| Praxis Dr. Lenz, Marina                                                   | Oelsnitz/Erzgeb.     |
| Praxis Dr. Weiler, Winfried                                               | Offenbach            |
| Gemeinschaftspraxis Dr. Lanzrath, Dr. Schlese, Dr. Breuer                 | Oldenburg            |
| Paracelsusklinik (Dr. Köncke)                                             | Osnabrück            |
| Klinikum Osnabrück (Dr. Beeke)                                            | Osnabrück            |
| Gemeinschaftspraxis Dr. Willmann, Dr. Rigsmeier, Dr. Drodofsky            | Osnabrück            |

|                                                                                               |                            |
|-----------------------------------------------------------------------------------------------|----------------------------|
| Praxis Dr. Meyer, Frank                                                                       | Osnabrück                  |
| Praxis Dr. Willmann, Peter                                                                    | Osnabrück                  |
| Praxis Dr. Cornelia Lohan                                                                     | Ottobrunn                  |
| Praxis Koch, Matthias Dr.                                                                     | Ottweiler                  |
| Praxis Dr. Kirchhoff, Elisabeth                                                               | Paderborn                  |
| Praxis Lenz, Christof Dr.                                                                     | Paderborn                  |
| Praxis Handstein, Annette Dr.                                                                 | Paderborn                  |
| Praxis Dr. Kielhorn, Ingrid                                                                   | Paderborn - Schloß Neuhaus |
| Praxis Dr. Garus, Lena                                                                        | Pfaffenhofen               |
| Praxis Dr. Garus, Jürgen                                                                      | Pfaffenhofen               |
| Praxis Dr. Shirkhani, Masood                                                                  | Pirmasens                  |
| Gemeinschaftspraxis Dr. Häntzschel, Dr. Arnold                                                | Pirna                      |
| Gemeinschaftspraxis Dr. med. Ulrike Bier, Dr. med. Caroline Bier                              | Poing                      |
| Praxis Dr. Pfennigsdorf, Stefan                                                               | Polch                      |
| Rund ums Auge Dr. Lange, Prof.Dr. Lanzl, W. Reich                                             | Prien/Chiemsee             |
| Augenzentrum Pulheim Dr. Sabine Wissel                                                        | Pulheim                    |
| Praxis Dr. Baldauf (Dr. Baldauf, Mechthild)                                                   | Püttlingen                 |
| Praxis Dr. Sander, Dirk                                                                       | Quakenbrück                |
| Praxis Dr. Prinz (Dr. Prinz, Georg)                                                           | Quierschied                |
| Elbland Augenzentrum GmbH (Dr. Porstmann)                                                     | Radebeul                   |
| Praxis Dr. Steinau, Maren                                                                     | Ransbach-Baumbach          |
| Praxis Dr. Rosati, Birgit                                                                     | Ratingen                   |
| Gemeinschaftspraxis Dr. Kallmann, Fanihagh & Partner (Fanihagh)                               | Ratingen                   |
| Gemeinschaftspraxis Dr. Kallmann, Fanihagh & Partner (Dr. Kallmann)                           | Ratingen                   |
| Gemeinschaftspraxis Dr. Kallmann, Fanihagh & Partner (Sabine Reich)                           | Ratingen                   |
| Gemeinschaftspraxis Dr. Kallmann, Dr. Fannihagh (Dr. Khanna)                                  | Ratingen                   |
| Gemeinschaftspraxis Oliver Vij, Fritz Olbrich                                                 | Recklinghausen             |
| Praxis Dr. Storp, Jürgen                                                                      | Recklinghausen             |
| Universitätsklinikum Regensburg Dr. Gamulescu, Dr. Chaber                                     | Regensburg                 |
| Gemeinschaftspraxis Dr. Claus Fuchs, Dr. Barbara Fuchs-Koelwel                                | Regensburg                 |
| Dr. Mathias Feichtiger                                                                        | Rendsburg                  |
| Praxis Dr. Ute Backheuer                                                                      | Rendsburg                  |
| Praxis Dr. Scheffler, Martin                                                                  | Rhauderfehn                |
| Praxis Dr. Clepce, Edda                                                                       | Rödental                   |
| Praxis Weuffen, Rainer Dr.                                                                    | Rostock                    |
| Augenarztpraxis Rostock Mitte                                                                 | Rostock                    |
| Augen- und LASIK-Zentrum Nordwest Dres. A. Eckard, A. u. M. Schellhorn, K. Fischer Harder, U. | Rostock                    |
| Praxis Dr. Wolf, Joachim                                                                      | Rotenburg                  |
| Praxis Kirchhoff, Ulrike Dr.                                                                  | Rotenburg                  |
| Praxis Dr. Martina Mohadjer-Wensing                                                           | Rotenburg (Wümme)          |
| Gemeinschaftspraxis Dr. Einsele, Dr. Weinschrod                                               | Rothenburg                 |
| Praxis Dr. Siebenbürger, H.                                                                   | Rothenburg o.d. Tauber     |
| Praxis Höckendorf, Krassimira Dr.                                                             | Rüdersdorf                 |
| Praxis Dr. Hary, Astrid                                                                       | Rudolstadt                 |
| Gemeinschaftspraxis Dr. Dankwardt, Dr. Lambert, Dr. Schmidl                                   | Rüsselsheim                |
| Praxis Dr. Strauß, Markus                                                                     | Saarbrücken                |
| Praxis Dr. Grundhöfer-Rausendorff Dr. Grundhöfer-Rausendorff, Gudrun                          | Saarbrücken                |
| Augenzentrum im Medizeum Gemeinschaftspraxis Prof. Dr. Mester, Dr. Schmitt                    | Saarbrücken                |
| Praxis Meurer, Ingo Dr.                                                                       | Saarbrücken                |
| Augenklinik des Klinikums Saarbrücken gGmbH (Dr. Ladewig, Markus)                             | Saarbrücken                |
| Praxis Posenauer, Beate Dr.                                                                   | Saarbrücken                |
| Praxis Dr. Binkle (Dr. Binkle, Frank)                                                         | Saarbrücken                |
| Gemeinschaftspraxis Dr. Anterist, Dr. Mees                                                    | Saarbrücken                |
| Gemeinschaftspraxis Dr. Zuche, Dr. Rauber                                                     | Saarburg                   |
| Praxis Dr. Diny (Dr. Brigitte Diny)                                                           | Saarlouis                  |
| Praxis Dr. Holak, Nikolai                                                                     | Salzgitter                 |
| Praxis Lina Burau                                                                             | Schloß Holte               |
| Praxis Dr. Doepner, Dietrich                                                                  | Schongau                   |
| Praxis Dr. Kroher, Gisela                                                                     | Schotten                   |
| Praxis Rabethge, Steffen Dr.                                                                  | Schriesheim                |
| Praxis Dr. Hutter                                                                             | Schrobenhausen             |
| Praxis Valentina Bobrowski                                                                    | Schüttorf                  |
| Überörtliche Gemeinschaftspraxis Marita Gabris, Dres. Rombold, Niederdelmann und Kollegen     | Schwabmünchen              |



|                                                                               |                        |
|-------------------------------------------------------------------------------|------------------------|
| Praxis Dr. Hoin, Hartmut                                                      | Schwalmstadt-Treysa    |
| Praxis Dr. Amann, Thomas                                                      | Schwandorf             |
| Praxis Dr. Domack, Harry                                                      | Schweinfurt            |
| Praxis Shoja, Shideh Dr.                                                      | Schwelm                |
| Belenus Augenzentrum, Gemeinschaftspraxis Dres. Frank, Fuchs, Briesen         | Siegen                 |
| Gemeinschaftspraxis Dres. Eckert und Kemmerling                               | Sindelfingen           |
| Praxis Heuer, Petra Dr. med.                                                  | Sindelfingen           |
| Gemeinschaftspraxis Dr. Schikora, Dr. Lauhoff                                 | Soest                  |
| Praxis Dr. Königs, Peter                                                      | Soest                  |
| Praxis Dr. Wulf, Sybille                                                      | Solingen               |
| Praxis Dr. Rolshoven (Dr. Rolshoven, Thomas)                                  | Solingen               |
| Gemeinschaftspraxis Dr. Grimm, Dr. Filz, Dr. Sebök Dr. Sebök, Tatiana-Mihaela | Speyer                 |
| Gemeinschaftspraxis Dr. Dag Peter Knaflic, Dr. Gabriele Knaflic               | St. Ingbert            |
| Gemeinschaftspraxis Dres. Fromberg Fromberg, Iris Dr.                         | St. Wendel             |
| Gemeinschaftspraxis Dres Hadjian                                              | Stadtoldendorf         |
| Praxis Dr. Boellert, Arvid                                                    | Stahnsdorf             |
| Augen-Klinik-Starnberg AKS (Priv.-Doz. Dr. med. habil. Weinberger)            | Starnberg              |
| Augenzentrum Dr. Hamacher Klinik GmbH Dr. Hamacher                            | Starnberg              |
| Praxis Gärtner und Wolff                                                      | Staßfurt               |
| Praxis Dr. Lünzer, Verena                                                     | Steinbach - Hallenberg |
| Praxis Dr. Fröhlich, H.-J.                                                    | Steinfurt              |
| Praxis Dr. Giesbert, Birgit                                                   | Steinhagen             |
| Praxis Dipl. Med. Landmann, Heike                                             | Stendal                |
| Praxis Dr. Czechowski, Edelgard                                               | Stendal                |
| Praxis Dr. Schendel, Heidi                                                    | Stollberg              |
| Praxis Jähnig, Thomas Dr.                                                     | Stralsund              |
| Ärztegemeinschaft am Strelasund (Dr. Meisel)                                  | Stralsund              |
| Praxis Dr. Aperlic, Katarina                                                  | Stuttgart              |
| Gemeinschaftspraxis Dr. Strachwitz, Dr. Kierspel                              | Stuttgart              |
| Praxis Dr. Kaiser, Adam                                                       | Stuttgart              |
| Praxis Dr. Hornemann, Karin                                                   | Stuttgart              |
| Praxis Dr. Heist, Daniel                                                      | Stuttgart              |
| Praxis Schleipen, Brigitte Dr.                                                | Stuttgart (Degerloch)  |
| Praxis Süß, Peter Dr.                                                         | Suhl                   |
| Praxis Dr. Szurman, Peter                                                     | Sulzbach / Saar        |
| Praxis Dr. Heintl, Walter                                                     | Sulzbach-Rosenberg     |
| Praxis Dr. Heller, Franziska                                                  | Tauberbischofsheim     |
| Praxis Dr. Fanselow-Hinrichs, Gisela                                          | Teltow                 |
| Augenzentrum Bodensee (Epple, Claudia Dr.)                                    | Tett nang              |
| Dr. Constanze Grunewald                                                       | Thalheim               |
| Praxis Dr. Jansen, Michael                                                    | Thuine                 |
| Praxis Grote-Schmidt, Annette Dr.                                             | Tönisvorst             |
| Gemeinschaftspraxis Dres Leick                                                | Traunstein             |
| Praxis Abel, Christian Dr.                                                    | Trier                  |
| Praxis Dr. Kremer (Dr. Kremer, Julia)                                         | Troisdorf              |
| Praxis Dr. Dunker, Stephan                                                    | Troisdorf-Sieglar      |
| Universitätsaugenklinik Tübingen (Prof. Dr. Ziemssen)                         | Tübingen               |
| Praxis Dr. Simeni, Laszlo, Dr. Simeni, Maria                                  | Unterhaching           |
| Praxis Dr. Raabe, Sabine                                                      | Vellmar                |
| Praxis Dr. Schmuckermeier, Jürgen                                             | Vilsbiburg             |
| Praxis Dr. Sindlinger (Dr. Sindlinger, Florian)                               | Völklingen             |
| Praxis Dr. Svoboda, Karl                                                      | Volkmarsen             |
| Gemeinschaftspraxis Dr. Korff, Dr. Entenmann und Kollegen                     | Waldshut-Tiengen       |
| Praxis Dipl.- Med. Egli, Petra                                                | Wanzleben-Börde        |
| Praxis Dr. Onken, Christine                                                   | Wedel                  |
| Praxis Dr. Strunck-Kortenbusch, Bianka                                        | Wegberg                |
| Praxis Dr. Bayer, Andreas                                                     | Weilheim               |
| Gemeinschaftspraxis Dres. Wetzels, Dr. Lindemann                              | Weinheim               |
| Gemeinschaftspraxis Dr. Köppe, Ulrich und Caroline                            | Weinsberg              |
| Praxis Dr. Zinck, Mechthild                                                   | Welzheim               |
| Praxis Dr. Schilfert, Annelie                                                 | Werdau                 |
| Gemeinschaftspraxis Dr. Buhl, Dr. Mönch                                       | Werl                   |
| Praxis Dr. Hufenbach, Ulrich                                                  | Wernigerode            |

|                                                                  |                     |
|------------------------------------------------------------------|---------------------|
| Augenzentrum Ammerland Dr. Breuer, Dr. Knecht (Dr. Angic)        | Westerstede         |
| Praxis Dr. Hellenthal, Peggy                                     | Wiesmoor            |
| Praxis Dr. Roy, Eveline                                          | Wilhelmshaven       |
| Gemeinschaftspraxis Timm, A., Dr. Beyer, Marion                  | Wismar              |
| Praxis Dr. Grabowska-Charabin, Anna                              | Wolfenbüttel        |
| Praxis Roesler, Ines Dr.                                         | Wolfenbüttel        |
| Augenzentrum Isartal Dr. Wolfgang Lackner (Dr. Dagiell-Hartmann) | Wolfratshausen      |
| Praxis Dr. Kuhn, Christine                                       | Wolfsburg           |
| Praxis Dr. Schlegel, Elvira                                      | Wolfsburg-Vorsfelde |
| Praxis Dr. Guwaich, Aiman                                        | Worms               |
| Praxis Hülsmann, Petra Dr.                                       | Worms               |
| Praxis Dr. Werner, Till                                          | Worms               |
| Praxis Steinbach, Claus-Michael Dr.                              | Wuppertal           |
| Praxis Machnik, Ilona Dr.                                        | Wuppertal           |
| Praxis Brab, Matthias Dr.                                        | Würselen            |
| Gemeinschaftspraxis Dr. Rothe, Dr. Schiefelbein                  | Würzburg            |
| Praxis Kerscher, Adolf Dr.                                       | Würzburg            |
| Praxis Murovski, Simo Dr. (Univ. Skopje)                         | Zschopau            |
